# Supplementary material for: The Dynamics of Soybean Leaf and Shoot Apical Meristem Transcriptome Undergoing Floral Initiation Process
Source: PubMed Central journal article supplement (PMC3675103; doi:10.1371/journal.pone.0065319), 2013-06-06

# Supplemental Figure 1. Distribution of mapped reads in relation to transcripts' body

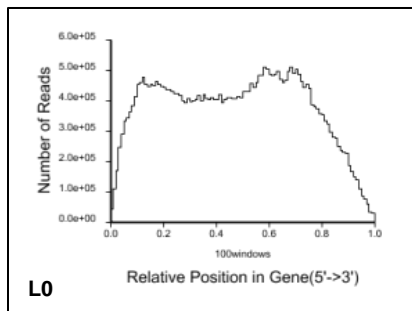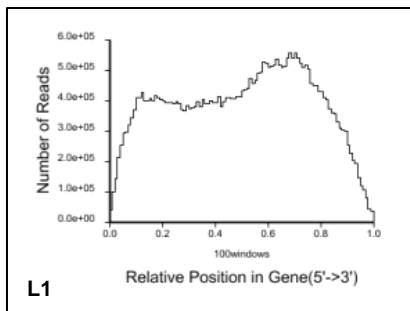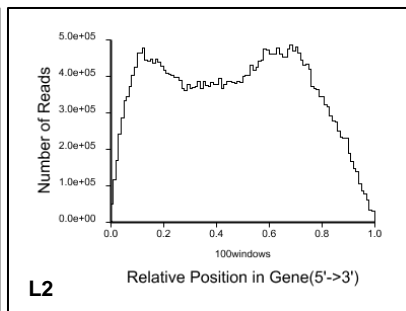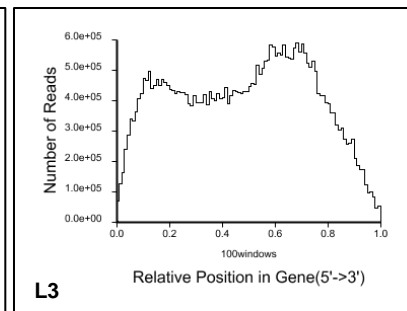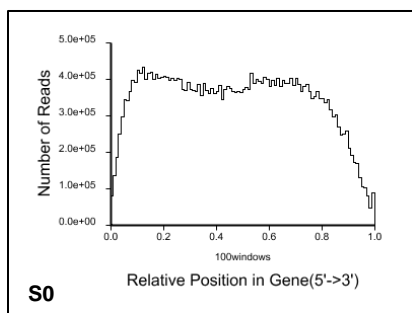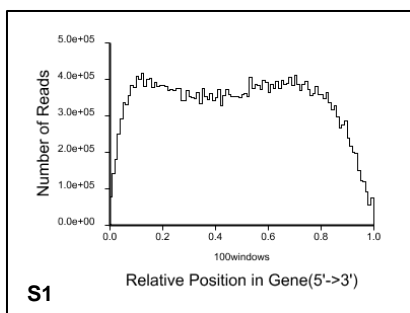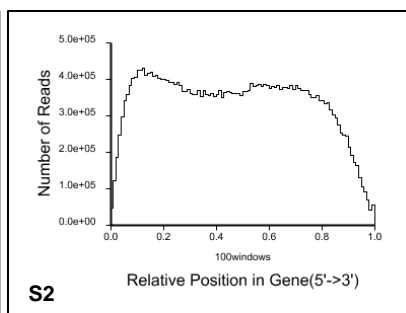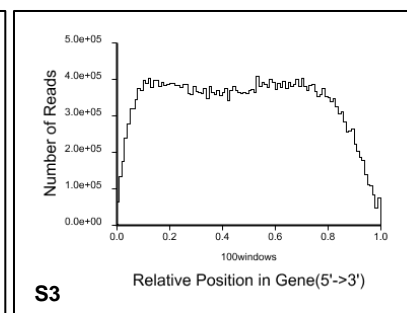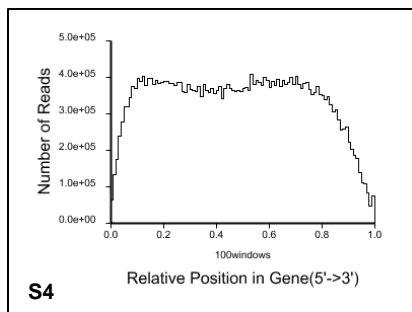

Supplement: pone.0065319.s001.pdf [file pone.0065319.s001.pdf]
